# Supplementary material
Source: PubMed Central journal article supplement (PMC3021060)
Supplement: 1016789108_pnas.1016789108_SI.pdf [file 1016789108_pnas.1016789108_SI.pdf]

# Supporting Information

Shaw et al. 10.1073/pnas.1016789108

## SI Methods

**Compound Set Enrichment Analysis (CSEA).** CSEA begins with a ranked list of small molecules, in our case ranked by signal-to-noise score (S2N), but in general other metrics can be used that reflect the correlation between the compound's cellular phenotype and the class distinction between mutant and wild-type cell lines. Given a prespecified set of compounds  $S$  (defined by a shared attribute; e.g., acting in the same metabolic pathway or belonging to the same drug class), CSEA asks if members of set  $S$  are randomly distributed throughout the ranked list or are enriched at the top or bottom (as would be expected if members of set  $S$  can discriminate between mutant and wild-type classes). An enrichment score (ES) is calculated by walking down the ranked list and increasing a running-sum statistic whenever a member of set  $S$  is encountered and decreasing the running-sum statistic whenever a compound that is not in set  $S$  is encountered. The greater the correlation between the effect of a compound in set  $S$  and the mutant vs. wild-type class distinction (i.e., the greater the absolute magnitude of S2N), the greater the increase in the running-sum statistic. The ES is defined as the greatest deviation from zero achieved by the running-sum statistic while walking through the entire ranked list; the ES is a weighted Kolmogorov–Smirnov-like statistic. The normalized ES is derived from the ES and adjusts for variation in compound set size (1).

**Lymphoblast Cell Line (LCL) Characterization, Small-Molecule Screen, and ATP Assay.** All LCLs were subjected to DNA sequencing to confirm the presence of the heterozygous C-to-T substitution in codon 268 exclusively in individuals with documented maturity onset diabetes of the young type 1 and not in unaffected individuals. Genomic DNA was purified using the Gentra Puregene DNA Purification Kit (Qiagen). A 315-bp fragment was amplified from exon 7 using the primers: 5'-GCA CCA GCT ATC TTG CCA AC -3' (forward) and 5'-AGG AGA AGT CTG GCA GAG CG -3' (reverse), confirmed by agarose gel electrophoresis, and purified by Qiaquick PCR purification kit (Qiagen). Sequencing primers were as follows: 5'- ACT AGA GGA GAG GGG TCA AC-3' (forward) and 5'-CGT TCT GGA GAG AGA GTC AG-3' (reverse). HNF4 $\alpha$  expression was assessed by quantitative RT-PCR (incorporating "no RT" and "no template" controls) using a commercially available TaqMan primer/probe set that spans the exon 3/exon 4 boundary (Applied Biosystems Hs00230853\_m1) and a control GAPDH TaqMan primer/set (Applied Biosystems Hs02786624\_g1) according to manufacturer instructions. RNA was isolated from LCLs using Trizol (Invitrogen), and cDNA

was prepared using the MessageSensor RT Kit (Ambion) according to manufacturer instructions. Relative EBV copy number was assessed by quantitative RT-PCR using a 66-bp fragment at the EBV DNA polymerase locus and an RNase P control (Applied Biosystems # 4316844) using previously published protocols (2). LCL growth rates were determined by counting growth-phase LCLs in triplicate for 4–5 d as previously published (2).

**shRNA Knockdown in Murine  $\beta$ -Cells.** Murine  $\beta$ -cells (MIN6 cells) were cultured in DMEM containing: 25 mM glucose, supplemented with 15% FBS (ATCC), penicillin (50 international units/mL), streptomycin (50  $\mu$ g/mL), and 27.5  $\mu$ M  $\beta$ -mercaptoethanol under humidified conditions of 5% CO<sub>2</sub> and 95% air at 37 °C. Upon stable infection with shRNA lentiviral infection particles, DMEM was supplemented with 1.25  $\mu$ g/mL puromycin.

Lentiviral particles were obtained from The RNAi Consortium at the Broad Institute and used according to recommended protocols (<http://www.broadinstitute.org/rnai/public/resources/protocols>). Lentivirus stocks were prepared from a hairpin-pLKO.1 vector containing a puromycin resistance gene, and a hairpin targeting HNF4 $\alpha$ ; lentivirus was also prepared from empty vector as a control. For lentiviral infection, cells were seeded at 30,000 cells/well in 96-well plates and cultured in DMEM until 70% confluence (~48 h). Media was replaced with 100  $\mu$ L antibiotic-free DMEM supplemented with 8  $\mu$ g/mL protamine sulfate and 8  $\mu$ L of virus/well. Plates were spun for 30 minutes at 825  $\times$ g, 37 °C. Following 24 h, media was removed and replaced with DMEM containing 1.25  $\mu$ g/mL puromycin. Selection continued for 5 d; all wells infected with the same hairpin were pooled and further expanded under continued selection.

HNF4 $\alpha$  knockdown was assessed by quantitative real time PCR using TaqMan gene expression assays targeted to mouse HNF4 $\alpha$  (FAM/MGB probe; Applied Biosystems Mm00433964\_m1), using  $\beta$ -Actin (VIC/MGB probe) as an endogenous control, according to manufacturer instructions. shRNA hairpin NM\_008261.2-1313-s1c1, comprised of the target sequence GCACCAATGTCATT-GTTGCTA, demonstrated the highest knockdown [70–80% by quantitative RT-PCR and Western blotting using 1:800 dilution of HNF4 $\alpha$  antibody (Santa Cruz Biotechnology: sc-6556)] and was selected for further studies.

## Other Supporting Information Files

Dataset S1 (XLS)

1. Subramanian A et al. (2005) Gene set enrichment analysis: A knowledge-based approach for interpreting genome-wide expression profiles. *Proc Natl Acad Sci USA* 102:15545–15550.

2. Choy E et al. (2008) Genetic analysis of human traits in vitro: Drug response and gene expression in lymphoblastoid cell lines. *PLoS Genet* 4:e1000287.



**Table S1. Coefficient of variation (CV, expressed as percent) for 384-well ATP assay in all LCL lines screened, following either 24 h or 48 h incubation of cells at 37 °C and 5% CO<sub>2</sub>**

| LCL line | CV, % (24 h) | CV, % (48 h) |
|----------|--------------|--------------|
| 1240     | 5.86         | 7.10         |
| 1242     | 7.62         | 7.81         |
| 1243     | 5.18         | 5.44         |
| 1244     | 6.56         | 6.55         |
| 1246     | 6.66         | 6.11         |
| 1247     | 4.44         | 12.34        |
| 1498     | 5.67         | 8.20         |
| 1956     | 5.87         | 5.58         |
| 8008     | 5.26         | 8.35         |
| 8106     | 5.90         | 9.73         |
| 8107     | 7.36         | 5.43         |
| 8392     | 4.49         | 7.02         |
| 8393     | 4.66         | 6.31         |
| 8756     | 4.95         | 5.44         |
| 10036    | 4.74         | 8.12         |
| 11452    | 7.96         | 6.44         |
| 11493    | 4.80         | 7.74         |
| 11494    | 5.58         | 6.03         |

Table S2. Compound sets used for enrichment analysis

|                                                           |                                                              |                                                            |
|-----------------------------------------------------------|--------------------------------------------------------------|------------------------------------------------------------|
| ace inhibitors, plain                                     | fibrates                                                     | pregnadien progestogens                                    |
| acetic acid derivatives and related<br>antiinflammatories | first-generation cephalosporins                              | pregnen (4) progestogens                                   |
| actin cytoskeleton signaling                              | fluoroquinolones                                             | progestogens                                               |
| adrenergic and dopaminergic agents                        | G2_M checkpoint                                              | prolactine inhibitors                                      |
| alkylating agents all                                     | GABA receptor signaling                                      | propionic acid antiinflammatories                          |
| alpha-adrenoreceptor antagonists                          | glutamate metabolism                                         | propulsives                                                |
| ALS signaling                                             | H2-receptor antagonists                                      | prostaglandins                                             |
| aminoalkyl ether antihistamines                           | histidine metabolism                                         | purine metabolism                                          |
| aminoglycoside antibacterials                             | HMG CoA-reductase inhibitors                                 | pyrimidine analogues                                       |
| aminoquinoline and methanolquinolines<br>antimalarials    | hydantoin antiepileptic                                      | pyrimidine metabolism                                      |
| amphenicols                                               | IL4 signaling                                                | quinoline antibiotics                                      |
| angiotensin ii antagonists, plain                         | IL6 signaling                                                | salicylic acid and derivatives                             |
| anthracyclines and related substances                     | imidazole and triazole antifungals antiprotozoals            | second-generation cephalosporins                           |
| antiarrhythmics, class IA                                 | imidazoline receptor agonists                                | selective beta-2-adrenoreceptor agonists                   |
| antiarrhythmics, class IB                                 | imidazoline vasodilators                                     | selective serotonin reuptake inhibitors                    |
| antiarrhythmics, class IC                                 | inositol phosphate metabolism                                | serotonin (5HT3) antagonists                               |
| anticholinergic ophthalmic                                | insulin signaling                                            | serotonin receptor signaling                               |
| antihistamines                                            | linoleic acid metabolism                                     | sterol biosynthesis                                        |
| antihistamines for systemic use all                       | local anesthetic—amides                                      | stilbene lignin coumarine biosynthesis                     |
| antithyroid                                               | local anesthetic—esters of aminobenzoic acid                 | substituted alkylamine antihistamines                      |
| arginine and proline metabolism                           | long term potentiation                                       | substituted ethylene diamine antihistamines                |
| benzamides                                                | macrolides                                                   | sulfonamide diuretics                                      |
| benzimidazole derivatives                                 | methionine metabolism                                        | sulfonamides                                               |
| beta-blocking agents, nonselective                        | monoamine oxidase inhibitors, nonselect                      | sulfonamides loop diuretics                                |
| beta-blocking agents, selective                           | nitrofurans derivatives                                      | sulfonamides, urea derivatives                             |
| beta-adrenoreceptor agonis                                | nitrogen metabolism                                          | sympathomimetic decongestants                              |
| beta-blocking agents all                                  | nitrogen mustard analogues                                   | synaptic long term potentiation                            |
| beta-lactamase resistant penicillins                      | nitric oxide cardiovascular signaling                        | synthetic anticholinergics, esters with<br>tertiary amines |
| biguanides                                                | nonselective monoamine reuptake inhibitor<br>antidepressants | synthetic anticholinergics, quaternary<br>amines           |
| butyrophenone derivatives                                 | nonselective phenylalkylamine calcium channel<br>blockers    | tertiary amine anticholinergic                             |
| calcium signaling drugs                                   | nucleosides and nucleotides antivirals                       | tetracycline antibiotics                                   |
| camp signaling                                            | omega-3 fatty acids                                          | tetrahydropyrimidine derivatives                           |
| carbonic anhydrase inhibitors                             | omega-6 fatty acids                                          | thiazides, plain                                           |
| cardiac B-adrenergic signaling                            | one carbon pool by folate                                    | thiazolidinediones                                         |
| centrally acting antiobesity products                     | opium alkaloids and derivatives                              | thioxanthene derivatives                                   |
| corticosteroids atc                                       | other antihistamines for systemic use                        | third-generation cephalosporins                            |
| coxibs                                                    | other potassium-sparing agents                               | thyroid hormones                                           |
| curare alkaloids                                          | other quaternary ammonium muscle relaxants                   | toll-like receptor signaling                               |
| digitalis glycosides                                      | other quinolones                                             | tryptophan metabolism                                      |
| dihydropyridine CA channel blockers                       | oxicam antiinflammatories                                    | tyrosine metabolism                                        |
| dopamine agonists                                         | parasympathomimetics ophthalmologic                          | vitamin K antagonists                                      |
| dopamine receptor signaling                               | penicillins with extended spectrum                           | xanthines                                                  |
| eicosanoid signaling                                      | phenothiazines with aliphatic side-chain                     | xenobiotic metabolism signaling                            |
| ergot alkaloids                                           | phenothiazines with piperazine structure                     |                                                            |
| ERK MAPK signaling                                        | phenothiazines with piperidine structure                     |                                                            |
| estrogen receptor signaling                               | phenylalanine metabolism                                     |                                                            |
| estrogens natural and semisynthetic<br>estrogens          | phosphodiesterase inhibitors                                 |                                                            |
| estrogens, all                                            | piperazine derivative antihistamines                         |                                                            |
| fatty acid metabolism                                     | platelet aggregation inhibitors                              |                                                            |
| fenamate antiinflammatories                               | PPAR signaling                                               |                                                            |

**Table S3. Individual compounds comprising top-ranked compound sets**

| Coxib<br>antiinflammatories | Potassium-sparing<br>diuretics          | Glucocorticoids                      | Imidazole/triazole<br>antiinfectives | HMG                         |                                                             | Acetic acid<br>antiinflammatories | Oxicam<br>antiinflammatories | Class Ic<br>antiarrhythmics                    | Linoleic acid                                  | Omega-6<br>fatty acids |
|-----------------------------|-----------------------------------------|--------------------------------------|--------------------------------------|-----------------------------|-------------------------------------------------------------|-----------------------------------|------------------------------|------------------------------------------------|------------------------------------------------|------------------------|
|                             |                                         |                                      |                                      | CoA-reductase<br>inhibitors | zomepirac sodium salt                                       |                                   |                              |                                                |                                                |                        |
| rofecoxib                   | amiloride<br>hydrochloride<br>dihydrate | dexamethasone                        | fluconazole                          | rosuvastatin                | zomepirac sodium salt                                       | tenoxicam                         | propafenone                  | arachidonic acid<br>(20:4, n-6)                | docosapentaenoic acid                          |                        |
| celecoxib                   | amiloride<br>hydrochloride              | betamethasone valerate               | sulconazole<br>nitrate               | simvastatin                 | diclofenac                                                  | piroxicam                         | flecainide                   | dihomo-gamma-<br>linolenic acid<br>(20:4, n-6) | arachidonic acid<br>(20:4, n-6)                |                        |
| valdecoxib                  | amiloride                               | hydrocortisone                       | oxiconazole<br>nitrate               | lovastatin                  | etodolac                                                    | meloxicam                         | propafenone<br>hydrochloride | gamma-linolenic<br>acid (18:3, n-6)            | adrenic acid<br>(22:4, n-6)                    |                        |
|                             | triamterene                             | clocortolone pivalate                | ornidazole                           | fluvastatin<br>sodium salt  | tolmetin sodium                                             |                                   | flecainide acetate           | 9(S)-HPODE                                     | dihomo-gamma-<br>linolenic acid<br>(18:3, n-6) |                        |
|                             |                                         | fluocinolone acetonide               | metronidazole                        | atorvastatin<br>calcium     | bufexamac                                                   |                                   |                              | 13-(S)-HODE                                    | gamma-linolenic acid<br>(18:3, n-6)            |                        |
|                             |                                         | hydrocortisone<br>hemisuccinate      | sertaconazole<br>nitrate             |                             | zomepirac sodium                                            |                                   |                              | linoleic acid                                  | eicosadienoic acid<br>(20:2, n-6)              |                        |
|                             |                                         | hydrocortisone acetate               | butoconazole<br>nitrate              |                             | acemetacin                                                  |                                   |                              | 9(S)-HODE                                      |                                                |                        |
|                             |                                         | methylprednisolone<br>aminonide      | miconazole<br>clotrimazole           |                             | aceclofenac                                                 |                                   |                              |                                                |                                                |                        |
|                             |                                         | triamcinolone diacetate              | econazole nitrate                    |                             | ketorolac tromethamine<br>tolmetin sodium salt<br>dihydrate |                                   |                              |                                                |                                                |                        |
|                             |                                         | prednisolone                         | isoconazole                          |                             | sulindac                                                    |                                   |                              |                                                |                                                |                        |
|                             |                                         | dexamethasone sodium<br>phosphate    | bifonazole                           |                             | diclofenac sodium                                           |                                   |                              |                                                |                                                |                        |
|                             |                                         | fluticasone propionate               | ketoconazole                         |                             |                                                             |                                   |                              |                                                |                                                |                        |
|                             |                                         | prednisolone acetate                 | tiabendazole                         |                             |                                                             |                                   |                              |                                                |                                                |                        |
|                             |                                         | betamethasone                        | flutrimazole                         |                             |                                                             |                                   |                              |                                                |                                                |                        |
|                             |                                         | fluciclonide                         | tinidazole                           |                             |                                                             |                                   |                              |                                                |                                                |                        |
|                             |                                         | triamcinolone                        | miconazole nitrate                   |                             |                                                             |                                   |                              |                                                |                                                |                        |
|                             |                                         | hydrocortisone sodium<br>phosphate   |                                      |                             |                                                             |                                   |                              |                                                |                                                |                        |
|                             |                                         | prednicarbate                        |                                      |                             |                                                             |                                   |                              |                                                |                                                |                        |
|                             |                                         | budesonide                           |                                      |                             |                                                             |                                   |                              |                                                |                                                |                        |
|                             |                                         | hydrocortisone butyrate              |                                      |                             |                                                             |                                   |                              |                                                |                                                |                        |
|                             |                                         | cortisone                            |                                      |                             |                                                             |                                   |                              |                                                |                                                |                        |
|                             |                                         | mometasone furoate                   |                                      |                             |                                                             |                                   |                              |                                                |                                                |                        |
|                             |                                         | 6alpha-methylprednisolone<br>acetate |                                      |                             |                                                             |                                   |                              |                                                |                                                |                        |
|                             |                                         | triamcinolone acetonide              |                                      |                             |                                                             |                                   |                              |                                                |                                                |                        |
|                             |                                         | hydrocortisone base                  |                                      |                             |                                                             |                                   |                              |                                                |                                                |                        |
|                             |                                         | diflorasone Diacetate                |                                      |                             |                                                             |                                   |                              |                                                |                                                |                        |
|                             |                                         | flunisolide                          |                                      |                             |                                                             |                                   |                              |                                                |                                                |                        |
|                             |                                         | fluorometholone                      |                                      |                             |                                                             |                                   |                              |                                                |                                                |                        |
|                             |                                         | medrysone                            |                                      |                             |                                                             |                                   |                              |                                                |                                                |                        |
|                             |                                         | alclometasone dipropionate           |                                      |                             |                                                             |                                   |                              |                                                |                                                |                        |
|                             |                                         | clobetasol propionate                |                                      |                             |                                                             |                                   |                              |                                                |                                                |                        |
|                             |                                         | halcinonide                          |                                      |                             |                                                             |                                   |                              |                                                |                                                |                        |
|                             |                                         | rimexolone                           |                                      |                             |                                                             |                                   |                              |                                                |                                                |                        |
|                             |                                         | dexamethasone acetate                |                                      |                             |                                                             |                                   |                              |                                                |                                                |                        |
|                             |                                         | prednisone                           |                                      |                             |                                                             |                                   |                              |                                                |                                                |                        |
|                             |                                         | cortisone acetate                    |                                      |                             |                                                             |                                   |                              |                                                |                                                |                        |

**Table S4. Two-way ANOVAs for compound treatment and LCL mutation status**

| Compound      | Interaction (compound × mutation status) |                 | DMSO vs. compound |                 | WT vs. HNF4 $\alpha$ k/d |                 |
|---------------|------------------------------------------|-----------------|-------------------|-----------------|--------------------------|-----------------|
|               | 2.5 mM glucose                           | 12.5 mM glucose | 2.5 mM glucose    | 12.5 mM glucose | 2.5 mM glucose           | 12.5 mM glucose |
| Linoleic acid | <0.0001                                  | 0.5734          | <0.0001           | 0.1062          | <0.0001                  | <0.0001         |
| Propafenone   | 0.0370                                   | 0.0461          | 0.3219            | <0.0001         | 0.0019                   | 0.0002          |
| Amiloride     | <0.0001                                  | 0.2564          | <0.0001           | 0.0494          | 0.0004                   | 0.2618          |
| Simvastatin   | 0.6469                                   | 0.0008          | <0.0001           | <0.0001         | 0.5952                   | 0.0180          |

*P* values are listed for the interaction between factors (i.e., effect of the small molecule depends on mutation status), the main effect of compound treatment (DMSO vs. compound), and the main effect of mutation status (wild-type vs. HNF4 $\alpha$  knockdown). Values are given for two-way ANOVA at low (2.5 mM) glucose and two-way ANOVA at high (12.5 mM) glucose.
